# Supplementary material
Source: PubMed Central journal article supplement (PMC3590884)
Supplement: chest_143_3_678_ds01.pdf [file chest_143_3_678_ds01.pdf]

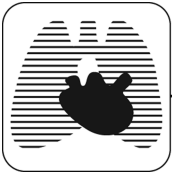

## A Novel Extracorporeal CO<sub>2</sub> Removal System

### Results of a Pilot Study of Hypercapnic Respiratory Failure in Patients With COPD

*Nausherwan K. Burki, MD, PhD, FCCP; Raj Kumar Mani, MD, FCCP; Felix J. F. Herth, MD, FCCP; Werner Schmidt, MD; Helmut Teschler, MD; Frank Bonin, MD; Heinrich Becker, MD; Winfried J. Randerath, MD, FCCP; Sven Stieglitz, MD; Lars Hagmeyer, MD; Christina Priegnitz, MD; Michael Pfeifer, MD; Stefan H. Blaas, MD; Christian Putensen, MD, PhD; Nils Theuerkauf, MD; Michael Quintel, MD, PhD; and Onnen Moerer, MD*

**e-Table 1.**

| <b>Site and IRB Protocol Code</b>                             | <b>Ethics Committee</b>                                                                                                                                            |
|---------------------------------------------------------------|--------------------------------------------------------------------------------------------------------------------------------------------------------------------|
| Artemis Health Institute<br>Code QSD-230-023, HL-CA-2000      | Artemis Health Sciences IRB<br>Artemis Health Institute<br>Sector 51, Gurgaon, Harayna India                                                                       |
| Thoraxklinik Heidelberg<br>Code 09/2176, HL-CA-1000           | Freiburger Ethik-Kommission GmbH International<br>Mozartstraße 21<br>D-79104 Freiburg                                                                              |
| Asklepios Barmbek<br>Hamburg<br>Code 09/2176, HL-CA-1000      | Ethik-Kommission der Ärztekammer Hamburg<br>Humboldtstr. 67a<br>22083 Hamburg                                                                                      |
| Ruhrlandklinik Essen<br>Code 09/2176, HL-CA-1000              | Ethik-Kommission der Medizinische Fakultät der<br>Universität Duisberg-Essen Universitätsklinikum<br>Robert-Koch-Strasse 9-11, 2. Stock<br>45147 Essen             |
| Klinik Donaustauf<br>Donaustauf<br>Code 09/2176, HL-CA-1000   | Ethikkommission der Medizinischen Fakultät der<br>Universität Regensburg Klinikum der Universität<br>Regensburg<br>Franz-Josef-Strauß Allee 11<br>93053 Regensburg |
| Krankenhaus Bethanien<br>Solingen<br>Code 09/2176, HL-CA-1000 | Ethik-Kommission der Universität Witten/Herdecke<br>Alfred-Herrhausen-Str. 50<br>58448 Witten                                                                      |

*Online supplements are not copyedited prior to posting.*

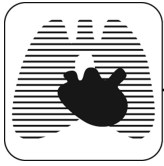

**e-Table 2.** Blood Values at Baseline (BL) and subsequent time points after institution of ECCO2R

**Hemoglobin Levels (g/dL)**  
(Normal range Males 13.5 – 17.2 G/dL; Females 12.0 – 15.2 G/dL)

| Subject ID | Hours from Hemolung Start |       |       |       |       |       |      |       |
|------------|---------------------------|-------|-------|-------|-------|-------|------|-------|
|            | BL                        | 24    | 48    | 72    | 96    | 120   | 144  | 168   |
| Group 1    |                           |       |       |       |       |       |      |       |
| 1          | 9.30                      | 8.40  | 7.99  |       | X     | X     | X    | X     |
| 2          | 13.79                     | 11.91 | 10.51 | X     | X     | X     | X    | X     |
| 3          | 13.00                     | 8.80  | 11.80 | 10.80 | 9.20  | 9.00  | 5.90 | X     |
| 4          | 8.60                      | 7.70  | 9.20  | 9.40  | 9.20  | 9.20  | 8.90 | X     |
| 5          | 12.09                     | 11.50 | 10.30 | 9.86  | 9.80  | 8.30  | X    | X     |
| 6          | 10.80                     | X     | X     | X     | X     | X     | X    | X     |
| 7          | 14.90                     | 13.20 | 13.50 | X     | X     | X     | X    | X     |
| GROUP 2    |                           |       |       |       |       |       |      |       |
| 1          | 10.40                     | 8.10  | 9.50  | X     | X     | X     | X    | X     |
| 2          | 9.90                      |       | 9.60  | 8.50  | 9.70  | 9.70  | 8.70 | 10.30 |
| GROUP 3    |                           |       |       |       |       |       |      |       |
| 1          | 9.40                      | 10.40 | 10.30 | 9.60  | 9.70  | 9.20  | 9.70 | 9.60  |
| 2          | 10.50                     | 10.10 | 9.70  | 8.70  | 10.40 | 10.70 | 9.60 | 10.20 |
| 3          | 9.70                      | 7.60  | 7.10  | 9.80  | 8.10  | X     | X    | X     |
| 4          | 8.70                      | X     | X     | X     | X     | X     | X    | X     |
| 5          | 9.99                      | 8.06  | 7.73  | 7.73  | X     | X     | X    | X     |
| 6          | 7.70                      | 10.80 | 10.01 | 9.89  | 9.35  | 9.51  | 8.89 | 8.60  |
| 7          | 8.80                      | 9.39  | X     | X     | X     | X     | X    | X     |
| 8          | 10.01                     |       |       | 7.40  | 9.30  | 9.01  | 9.10 | 8.89  |
| 9          | 10.10                     | 7.49  | 8.60  | 8.89  | 10.80 | 10.70 | X    | X     |
| 10         | 9.35                      | 9.10  | 9.39  | 9.39  | X     | X     | X    | X     |
| 11         | 10.80                     | 9.60  | 9.70  | 8.80  | 9.01  | 8.30  | X    | X     |

*Online supplements are not copyedited prior to posting.*

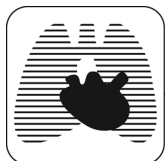

**Platelet Count (Gpt/l)**  
(Normal range 140 – 380/nL)

| Subject ID | Hours from Hemolung Start |     |     |     |     |     |     |     |
|------------|---------------------------|-----|-----|-----|-----|-----|-----|-----|
|            | BL                        | 24  | 48  | 72  | 96  | 120 | 144 | 168 |
| GROUP 1    |                           |     |     |     |     |     |     |     |
| 1          | 320                       | 270 | 199 | X   | X   | X   | X   | X   |
| 2          | 140                       | 85  | 70  | X   | X   | X   | X   | X   |
| 3          | 135                       | 106 | 84  | 97  | 94  | 88  | 45  | X   |
| 4          | 246                       | 168 | 161 | 134 | 112 | 114 | 93  | X   |
| 5          | 276                       | 142 | 119 | 112 | 108 | 85  | X   | X   |
| 6          | 177                       | X   | X   | X   | X   | X   | X   | X   |
| 7          | 223                       | 138 | 116 | X   | X   | X   | X   | X   |
| GROUP 2    |                           |     |     |     |     |     |     |     |
| 1          | 277                       | 146 | 108 | X   | X   | X   | X   | X   |
| 2          | 334                       |     | 297 | 256 | 199 | 217 | 212 | 167 |
| GROUP 3    |                           |     |     |     |     |     |     |     |
| 1          | 235                       | 242 | 231 | 213 | 219 | 218 | 224 | 233 |
| 2          | 276                       | 171 | 156 | 136 | 109 | 113 | 101 | 99  |
| 3          | 190                       | 177 | 160 | 93  | 98  | X   | X   | X   |
| 4          | 281                       | X   | X   | X   | X   | X   | X   | X   |
| 5          | 182                       | 89  | 103 | 94  | X   | X   | X   | X   |
| 6          | 270                       | 202 | 178 | 150 | 129 | 110 | 104 | 110 |
| 7          | 437                       | 299 | X   | X   | X   | X   | X   | X   |
| 8          | 413                       |     |     | 228 | 204 | 198 | 200 | 194 |
| 9          | 235                       | 137 | 97  | 106 | 97  | 71  | X   | X   |
| 10         | 160                       | 161 | 130 | 106 | X   | X   | X   | X   |
| 11         | 345                       | 221 | 247 | 226 | 158 | 148 | X   | X   |

*Online supplements are not copyedited prior to posting.*

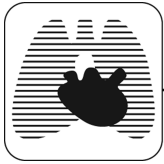

**Plasma Free Hemoglobin (mg/dL)**  
(Normal <40mg/dL)

| Subject ID | Hours from Hemolung Start |      |      |      |      |      |      |      |
|------------|---------------------------|------|------|------|------|------|------|------|
|            | BL                        | 24   | 48   | 72   | 96   | 120  | 144  | 168  |
| GROUP 3    |                           |      |      |      |      |      |      |      |
| 1          | 15.8                      | 17.6 | 27.1 | 29.1 | X    | X    | X    | X    |
| 2          | 37.5                      | 24.1 | 25.6 | X    | X    | X    | X    | X    |
| 3          | 20.0                      | 30.0 | 23.0 | 21.0 | 16.0 | 18.0 | X    | X    |
| 4          |                           | 10.0 | 8.0  | 9.6  | 8.0  | 27.0 | 18.0 | X    |
| 5          | 6.5                       | 1.3  | 0.9  | 1.0  |      | 4.2  | X    | X    |
| 6          | 17.1                      | X    | X    | X    | X    | X    | X    | X    |
| 7          |                           | 5.3  | 45.0 | X    | X    | X    | X    | X    |
| GROUP 2    |                           |      |      |      |      |      |      |      |
| 1          | 7.0                       |      | 10.0 | X    | X    | X    | X    | X    |
| 2          |                           |      | 12.0 | 22.0 | 14.0 | 16.0 | 13.0 | 13.0 |
| GROUP 3    |                           |      |      |      |      |      |      |      |
| 1          | 9.0                       | 16.0 | 10.0 | 9.0  | 10.0 | 10.0 | 17.0 |      |
| 2          |                           | 25.0 | 21.0 | 14.0 | 45.0 | 55.0 |      | 25.0 |
| 3          |                           |      | 35.0 |      | X    | X    | X    | X    |
| 4          |                           | X    | X    | X    | X    | X    | X    | X    |
| 5          | 26.1                      | 17.7 | 9.2  | 12.2 | X    | X    | X    | X    |
| 6          |                           | 10.4 | 7.4  | 29.1 | 9.4  | 11.0 | 8.7  | 8.6  |
| 7          | 17.7                      | 16.8 | X    | X    | X    | X    | X    | X    |
| 8          |                           |      |      |      |      |      |      |      |
| 9          |                           |      |      |      | 12.8 | 6.6  | X    | X    |
| 10         | 2.7                       | 2.9  | 6.0  | 6.1  | X    | X    | X    | X    |
| 11         | 6.2                       | 3.1  | 39.8 | 5.3  |      | 4.2  | X    | X    |

*Online supplements are not copyedited prior to posting.*

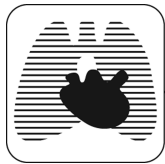

**Serum Creatinine (mg/dL)**  
**(Normal range 0.6 – 1.2 mg/dL)**

| Subject ID | Hours from Hemolung Start |     |     |     |     |     |     |     |
|------------|---------------------------|-----|-----|-----|-----|-----|-----|-----|
|            | BL                        | 24  | 48  | 72  | 96  | 120 | 144 | 168 |
| GROUP 1    |                           |     |     |     |     |     |     |     |
| 1          | 2.1                       | 2.2 | 2.1 | 1.8 | X   | X   | X   | X   |
| 2          | 0.7                       | 0.5 | 0.5 | X   | X   | X   | X   | X   |
| 3          | 0.8                       | 0.7 | 0.6 | 0.5 | 0.5 | 0.5 | 0.5 | X   |
| 4          | 0.8                       | 0.8 | 0.8 | 0.8 | 0.9 | 1.0 | 0.9 | X   |
| 5          | 0.8                       | 0.8 | 0.7 | 0.7 | 0.7 | 0.8 | X   | X   |
| 6          | 0.5                       | X   | X   | X   | X   | X   | X   | X   |
| 7          | 1.0                       | 0.6 | 0.5 | X   | X   | X   | X   | X   |
| GROUP 2    |                           |     |     |     |     |     |     |     |
| 1          | 0.4                       | 0.5 | 0.4 | X   | X   | X   | X   | X   |
| 2          | 0.5                       |     | 0.6 | 0.6 | 0.6 | 0.6 | 0.5 | 0.4 |
| GROUP 3    |                           |     |     |     |     |     |     |     |
| 1          | 0.9                       | 0.9 | 1.0 | 1.0 | 0.8 | 0.7 | 0.7 | 0.7 |
| 2          | 1.3                       | 1.0 | 0.9 | 1.0 | 1.3 | 1.5 | 1.9 | 1.8 |
| 3          | 0.6                       | 0.6 | 1.1 | 1.4 | 1.1 | X   | X   | X   |
| 4          | 0.4                       | X   | X   | X   | X   | X   | X   | X   |
| 5          | 0.8                       | 0.7 | 0.6 | 0.6 | X   | X   | X   | X   |
| 6          | 0.6                       | 0.7 | 0.5 | 0.5 | 0.5 | 0.5 | 0.5 | 0.5 |
| 7          | 1.1                       | 1.1 | X   | X   | X   | X   | X   | X   |
| 8          | 0.4                       | 0.3 | 0.3 | 0.3 | 0.3 | 0.3 | 0.3 | 0.3 |
| 9          | 0.7                       | 0.5 | 0.5 | 0.5 | 0.5 | 0.4 | X   | X   |
| 10         | 0.8                       | 1.0 | 0.9 | 0.9 | X   | X   | X   | X   |
| 11         | 0.7                       | 0.7 | 0.6 | 0.7 | 0.7 | 0.7 | X   | X   |

*Online supplements are not copyedited prior to posting.*



**Serum Alanine Transaminase (ALT) (u/L)**  
**(Normal range Males <50 u/L; Females <35 u/L)**

| Subject ID | Hours from Hemolung Start |       |       |       |      |      |       |       |
|------------|---------------------------|-------|-------|-------|------|------|-------|-------|
|            | BL                        | 24    | 48    | 72    | 96   | 120  | 144   | 168   |
| GROUP 1    |                           |       |       |       |      |      |       |       |
| 1          | 364.7                     | 205.8 | 100.2 | 55.8  | X    | X    | X     | X     |
| 2          | 25.8                      | 18.0  |       | X     | X    | X    | X     | X     |
| 3          | 28.2                      |       |       |       |      |      | X     | X     |
| 4          | 29.0                      | 23.0  |       |       |      |      |       | X     |
| 5          | 15.6                      | 17.8  | 15.0  | 18.9  | 31.2 | 34.2 | X     | X     |
| 6          | 18.7                      | X     | X     | X     | X    | X    | X     | X     |
| 7          | 18.0                      | 138.0 | 115.8 | X     | X    | X    | X     | X     |
| GROUP 2    |                           |       |       |       |      |      |       |       |
| 1          | 13.0                      | 10.0  | 11.0  | X     | X    | X    | X     | X     |
| 2          | 44.0                      |       | 34.0  | 34.0  | 33.0 | 41.0 | 32.0  | 31.0  |
| GROUP 3    |                           |       |       |       |      |      |       |       |
| 1          | 62.0                      | 126.0 | 90.0  | 60.0  | 61.0 | 81.0 | 136.0 | 124.0 |
| 2          | 309.0                     | 212.0 | 160.0 | 102.0 | 96.0 | 75.0 | 65.0  | 57.0  |
| 3          | 40.0                      |       | 96.9  | 75.9  | X    | X    | X     | X     |
| 4          | 106.2                     | X     | X     | X     | X    | X    | X     | X     |
| 5          | 66.0                      | 67.8  | 57.0  | 49.2  | X    | X    | X     | X     |
| 6          | 22.0                      | 27.0  | 27.0  | 22.8  | 25.8 | 31.2 | 37.2  | 34.8  |
| 7          | 64.2                      | 37.8  | X     | X     | X    | X    | X     | X     |
| 8          | 18.0                      | 13.2  | 10.8  | 10.8  | 10.2 | 10.8 | 13.2  | 16.2  |
| 9          | 54.0                      | 48.0  | 39.0  | 49.8  | 60.0 | 63.0 | X     | X     |
| 10         | 75.0                      | 54.0  | 52.8  | 58.2  | X    | X    | X     | X     |
| 11         | 12.0                      | 10.8  | 10.8  | 9.0   | 9.0  | 13.2 | X     | X     |

*Online supplements are not copyedited prior to posting.*

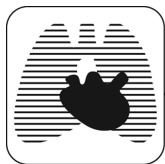

**Serum Aspartate transaminase (AST) (U/L)**  
(Normal range Males <50 u/L; Females <35 u/L)

| Subject ID | Hours from Hemolung Start |       |      |      |      |      |       |       |
|------------|---------------------------|-------|------|------|------|------|-------|-------|
|            | BL                        | 24    | 48   | 72   | 96   | 120  | 144   | 168   |
| GROUP 1    |                           |       |      |      |      |      |       |       |
| 1          | 268.7                     | 66.0  | 40.2 | 25.8 | X    | X    | X     | X     |
| 2          | 19.8                      | 16.8  |      | X    | X    | X    | X     | X     |
| 3          | 31.2                      |       |      |      |      |      | X     | X     |
| 4          | 20.0                      | 19.0  |      |      |      |      |       | X     |
| 5          | 18.6                      | 34.6  | 24.6 | 25.8 | 31.2 | 49.2 | X     | X     |
| 6          | 23.0                      | X     | X    | X    | X    | X    | X     | X     |
| 7          | 31.8                      | 73.8  | 45.0 | X    | X    | X    | X     | X     |
| GROUP 2    |                           |       |      |      |      |      |       |       |
| 1          | 15.0                      | 22.0  | 23.0 | X    | X    | X    | X     | X     |
| 2          | 27.0                      |       | 37.0 | 48.0 | 48.0 | 77.0 | 56.0  | 46.0  |
| GROUP 3    |                           |       |      |      |      |      |       |       |
| 1          | 45.0                      | 164.0 | 58.0 | 38.0 | 50.0 | 84.0 | 138.0 | 102.0 |
| 2          | 210.0                     | 110.0 | 60.0 | 40.0 | 47.0 | 65.0 | 72.0  | 49.0  |
| 3          | 41.0                      |       | 47.0 | 40.0 | 27.0 | X    | X     | X     |
| 4          | 28.8                      | X     | X    | X    | X    | X    | X     | X     |
| 5          | 37.2                      | 40.8  | 39.0 | 34.8 | X    | X    | X     | X     |
| 6          | 14.0                      | 29.0  | 25.2 | 21.0 | 25.8 | 25.8 | 31.2  | 25.8  |
| 7          | 46.8                      | 37.8  | X    | X    | X    | X    | X     | X     |
| 8          | 16.8                      | 13.8  | 9.0  | 12.0 | 10.8 | 13.8 | 13.8  | 16.2  |
| 9          | 31.2                      | 34.8  | 28.2 | 43.2 | 46.2 | 39.0 | X     | X     |
| 10         | 25.2                      | 19.8  | 25.2 |      | X    | X    | X     | X     |
| 11         | 10.2                      | 10.2  | 13.8 | 7.8  | 9.0  | 13.2 | X     | X     |

*Online supplements are not copyedited prior to posting.*



**Serum Bilirubin, mg/dl**  
**(Normal range 0.1 – 1.2 mg/dL)**

| Subject | baseline | 24 Hrs | 48 Hrs | 72 Hrs | 96 Hrs | 120 Hrs | 144 Hrs | 168 Hrs |
|---------|----------|--------|--------|--------|--------|---------|---------|---------|
| Group 1 |          |        |        |        |        |         |         |         |
| 1       | 0.20     | 0.90   | 1.00   | 1.00   |        |         |         |         |
| 2       | 0.90     | 1.00   |        |        |        |         |         |         |
| 3       | 0.42     |        |        |        |        |         |         |         |
| 4       | 0.45     | 0.60   |        | 1.00   | 0.95   |         |         |         |
| 5       | 0.48     | 1.37   | 0.93   |        |        | 1.60    |         |         |
| 6       | 0.67     |        |        |        |        |         |         |         |
| 7       | 0.45     | 0.72   | 0.67   |        |        |         |         |         |
| Group 2 |          |        |        |        |        |         |         |         |
| 1       | 0.22     | 0.30   | 0.31   |        |        |         |         |         |
| 2       | 0.37     |        | 0.80   | 0.80   | 0.77   | 0.83    | 0.65    | 0.65    |
| Group 3 |          |        |        |        |        |         |         |         |
| 1       | 0.27     | 0.56   | 0.92   | 1.50   | 1.13   | 0.88    | 0.84    | 0.69    |
| 2       | 0.64     | 0.61   | 0.46   | 0.44   | 0.74   | 0.77    | 1.26    | 1.10    |
| 3       | 0.20     | 0.50   | 0.60   | 0.50   | 0.40   |         |         |         |
| 4       |          |        |        |        |        |         |         |         |
| 5       | 0.60     | 0.47   | 0.55   | 0.64   |        |         |         |         |
| 6       |          | 0.24   | 0.22   | 0.21   | 0.23   | 0.23    | 0.21    | 0.24    |
| 7       | 0.30     | 0.40   |        |        |        |         |         |         |
| 8       |          |        |        |        |        |         |         |         |
| 9       | 0.55     | 0.39   | 0.56   | 0.65   | 1.02   | 0.62    |         |         |
| 10      | 0.25     | 0.33   | 0.39   | 0.69   |        |         |         |         |
| 11      | 0.60     | 0.53   | 0.33   | 0.42   | 0.38   | 0.38    |         |         |

*Online supplements are not copyedited prior to posting.*
